# Supplementary material for: Silver nanoparticles loaded on lactose/alginate: in situ synthesis, catalytic degradation, and pH-dependent antibacterial activity
Source: publisher site journal article supplement (doi:10.3762/bjnano.14.64), 2023-07-04
Supplement: Additional file 1 [file 2190-4286-14-64-S1.pdf]

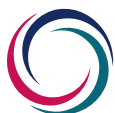

## Supporting Information

for

### **Silver nanoparticles loaded on lactose/alginate: in situ synthesis, catalytic degradation, and pH-dependent antibacterial activity**

Nguyen Thi Thanh Tu, T. Lan-Anh Vo, T. Thu-Trang Ho, Kim-Phuong T. Dang, Van-Dung Le, Phan Nhat Minh, Chi-Hien Dang, Vinh-Thien Tran, Van-Su Dang, Tran Thi Kim Chi, Hieu Vu-Quang, Radek Fajgar, Thi-Lan-Huong Nguyen, Van-Dat Doan and Thanh-Danh Nguyen

*Beilstein J. Nanotechnol.* **2023**, *14*, 781–792. [doi:10.3762/bjnano.14.64](https://doi.org/10.3762/bjnano.14.64)

## Additional experimental data

**Table S1:** Physical parameters calculated from XRD patterns.

| Materials         | No. | 2 $\theta$<br>(degree) | cos $\theta$ | FWHM<br>(Degree) | $\beta$<br>(radian) | Crystallite<br>size 'D'<br>( $\mu\text{m}$ ) | Interpla<br>nar<br>spacing<br>$d$ ( $\text{\AA}$ ) | $h k l$<br>Identified<br>from peak | $h^2+k^2$<br>$+l^2$ | Lattice<br>const.<br>$a$ from $d$<br>( $\text{\AA}$ ) | Cell<br>volume<br>( $\text{\AA}^3$ ) |
|-------------------|-----|------------------------|--------------|------------------|---------------------|----------------------------------------------|----------------------------------------------------|------------------------------------|---------------------|-------------------------------------------------------|--------------------------------------|
| AgNPs@Lac/Alg-0.3 | 1   | 38.8347                | 0.3389       | 0.9431           | 0.48                | 0.008378                                     | 17.5487                                            | 2.3759                             | 1 1 1               | 3                                                     | 4.1152                               |
|                   | 2   | 44.5260                | 0.3886       | 0.9254           | 0.41                | 0.007156                                     | 20.9371                                            | 2.0332                             | 2 0 0               | 4                                                     | 4.0664                               |
|                   | 3   | 64.2130                | 0.5604       | 0.8470           | 0.62                | 0.010821                                     | 15.1268                                            | 1.4493                             | 2 2 0               | 8                                                     | 4.0993                               |
|                   | 4   | 77.4092                | 0.6755       | 0.7803           | 0.66                | 0.011519                                     | 15.4243                                            | 1.2319                             | 3 1 1               | 11                                                    | 4.0857                               |
| AgNPs@Lac/Alg-0.7 | 1   | 38.0153                | 0.3317       | 0.9454           | 0.48                | 0.008377                                     | 17.5050                                            | 2.3651                             | 1 1 1               | 3                                                     | 4.0965                               |
|                   | 2   | 44.5010                | 0.3883       | 0.9255           | 0.54                | 0.009424                                     | 15.8952                                            | 2.0343                             | 2 0 0               | 4                                                     | 4.0686                               |
|                   | 3   | 64.1030                | 0.5594       | 0.8476           | 0.80                | 0.013962                                     | 11.7162                                            | 1.4515                             | 2 2 0               | 8                                                     | 4.1055                               |
|                   | 4   | 77.3992                | 0.6754       | 0.7804           | 0.72                | 0.012566                                     | 14.1379                                            | 1.2320                             | 3 1 1               | 11                                                    | 4.0861                               |

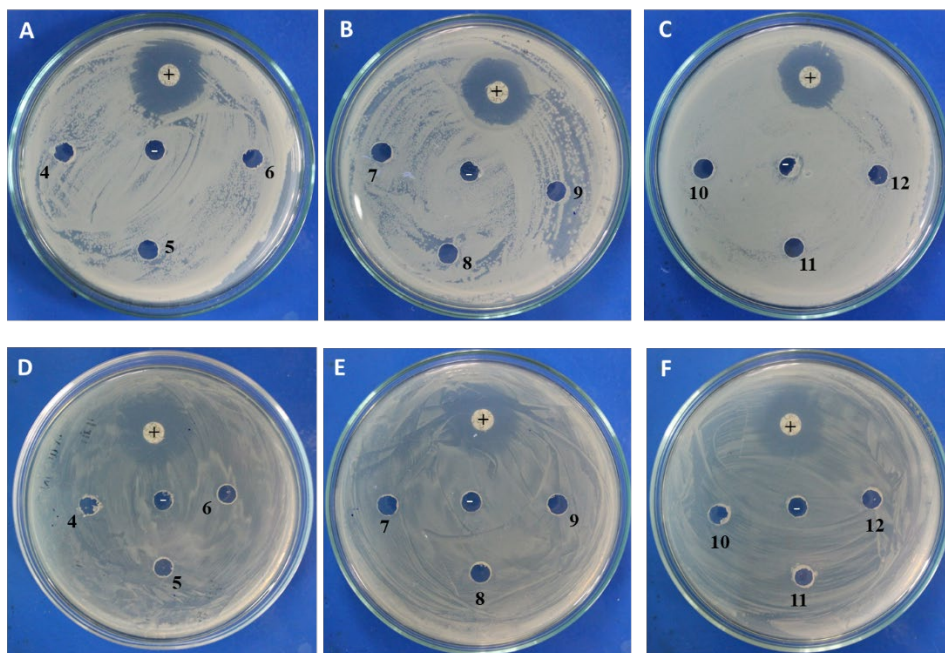

**Figure S1:** Antibacterial activity of controls with indicated pH value without nanocomposite. The controls exhibit no inhibition against both bacterial strains.
